# Supplementary material for: Theoretical study on the excited state decay properties of iron(ii) polypyridine complexes substituted by bromine and chlorine
Source: Royal Society of Chemistry journal article supplement (doi:10.1039/c9ra06366h), 2019-01-01
Supplement: c9ra06366h1.pdf [file c9ra06366h1.pdf]

Electronic Supplementary Information

**Theoretical study on the excited state decay properties of iron (II)  
polypyridine complexes substituted by bromine and chlorine**

Yuan Li, Xue-Wen Fan, Jie Chen, Fu-Quan Bai\*, Hong-Xing Zhang\*

E-mail address: [baifq@jlu.edu.cn](mailto:baifq@jlu.edu.cn) (F.-Q. Bai); [zhanghx@jlu.edu.cn](mailto:zhanghx@jlu.edu.cn) (H.-X. Zhang)

International Joint Research Laboratory of Nano-Micro Architecture Chemistry,  
Laboratory of Theoretical and Computational Chemistry, Institute of Theoretical  
Chemistry, Jilin University, Changchun 130023, People's Republic of China

**Table S1** The Electron transition configurations, excitation energies, oscillator strengths ( $f$ ), and assignment for the main absorption band of 1 and 2.

| Complexes           | Excited State   | Energy(nm/<br>eV) | $f$      | Major contrib. <sup>a</sup> | Assignment        |
|---------------------|-----------------|-------------------|----------|-----------------------------|-------------------|
| 1                   | Q <sub>6</sub>  | 445/2.79          | 0.0036   | H(A)→L+2(A) (14%)           | ILCT              |
|                     |                 |                   |          | H-1(A)→L+3(A) (12%)         | ILCT              |
|                     |                 |                   |          | H-1(B)→L+3(B) (15%)         | ILCT/LMCT         |
|                     |                 |                   |          | H(B)→L(B) (14%)             | MLCT/LLCT         |
|                     | Q <sub>10</sub> | 407/3.05          | 0.0228   | H(B)→L(B) (59%)             | MLCT/LLCT         |
|                     |                 |                   |          | H(B)→L+5(B) (13%)           | MLCT/LLCT/MC      |
|                     | Q <sub>13</sub> | 341/3.64          | 0.2893   | H-1(A)→L(A) (10%)           | ILCT/LMCT         |
|                     |                 |                   |          | H(A)→L+1(A) (10%)           | ILCT              |
|                     |                 |                   |          | H-1(B)→L(B) (54%)           | ILCT/LMCT         |
|                     | Q <sub>14</sub> | 338/3.67          | 0.3986   | H(A)→L(A) (29%)             | ILCT/LMCT         |
|                     |                 |                   |          | H-2(A)→L(A) (18%)           | MLCT/LLCT         |
|                     |                 |                   |          | H-2(B)→L(B) (25%)           | ILCT/MC           |
|                     |                 |                   |          | H-1(B)→L+1(B) (16%)         | ILCT/LMCT         |
|                     | 2               | Q <sub>5</sub>    | 446/2.78 | 0.0041                      | H(A)→L+3(A) (14%) |
| H-1(A)→L+2(A) (12%) |                 |                   |          |                             | ILCT              |
| H(B)→L(B) (16%)     |                 |                   |          |                             | MLCT/MC           |
| H-1(B)→L+3(B) (14%) |                 |                   |          |                             | ILCT              |
| H-2(B)→L+2(B) (10%) |                 |                   |          |                             | ILCT/LMCT         |
| Q <sub>7</sub>      |                 | 420/2.95          | 0.0206   | H(B)→L(B) (56%)             | MLCT/MC           |
| Q <sub>13</sub>     |                 | 345/3.59          | 0.3143   | H(A)→L(A) (17%)             | ILCT/LMCT         |
|                     |                 |                   |          | H-1(B)→L(B) (50%)           | ILCT/LMCT         |
| Q <sub>14</sub>     |                 | 340/3.64          | 0.0634   | H-2(A)→L(A) (84%)           | MLCT/LLCT         |
| Q <sub>15</sub>     |                 | 339/3.66          | 0.3746   | H(A)→L+1(A) (14%)           | ILCT/LMCT         |
|                     |                 |                   |          | H-1(A)→L(A) (12%)           | ILCT/LMCT         |
|                     |                 |                   |          | H-2(B)→L(B) (51%)           | ILCT/LMCT         |

<sup>a</sup> Q is the initial letter of quintet. H means HOMO and L means LUMO. Meanwhile, A means alpha and B means beta. ILCT/LLCT are short for intraligand/ ligand-to-ligand charge transfer. LMCT/MLCT mean ligand-to-metal/ metal-to-ligand charge transfer. MC represents metal-center charge transfer.

**Table S2** The list of single point energy (eV) of **1** and **2** with the same bond lengths of Fe-N<sub>c</sub>.

| Bond lengths (Å) | <b>1</b> |         |        |         | <b>2</b> |         |        |         |
|------------------|----------|---------|--------|---------|----------|---------|--------|---------|
|                  | Singlet  | Triplet | Septet | Quintet | Singlet  | Triplet | Septet | Quintet |
| 1.82             | 1.06     | 0.94    | 2.92   | 0.98    | 0.95     | 0.95    | 2.90   | 1.06    |
| 1.84             | 0.99     | 0.86    |        | 0.81    | 0.87     | 0.87    |        | 0.88    |
| 1.86             | 0.94     | 0.80    | 2.61   | 0.66    | 0.82     | 0.80    | 2.59   | 0.72    |
| 1.88             | 0.91     | 0.75    |        | 0.52    | 0.79     | 0.75    |        | 0.58    |
| 1.9              | 0.90     | 0.72    | 2.40   | 0.41    | 0.77     | 0.72    | 2.38   | 0.46    |
| 1.91             | 0.90     | 0.72    | 2.36   | 0.36    | 0.77     | 0.71    | 2.34   | 0.41    |
| 1.92             | 0.91     | 0.71    | 2.32   | 0.31    | 0.78     | 0.71    | 2.30   | 0.36    |
| 1.93             | 0.92     | 0.71    | 2.29   | 0.27    | 0.79     | 0.71    | 2.26   | 0.31    |
| 1.95             | 0.95     | 0.72    |        | 0.19    | 0.81     | 0.71    |        | 0.23    |
| 1.97             | 0.99     | 0.74    | 2.21   | 0.13    | 0.85     | 0.73    | 2.17   | 0.16    |
| 1.99             | 1.05     | 0.77    |        | 0.08    | 0.91     | 0.76    |        | 0.11    |
| 2.01             | 1.11     | 0.81    | 2.18   | 0.05    | 0.97     | 0.80    | 2.13   | 0.06    |
| 2.03             | 1.19     | 0.86    | 2.18   | 0.02    | 1.04     | 0.85    | 2.13   | 0.03    |
| 2.05             | 1.28     | 0.92    | 2.20   | 0       | 1.13     | 0.90    | 2.14   | 0.01    |
| 2.07             | 1.37     | 0.99    |        | 0       | 1.22     | 0.97    |        | 0       |
| 2.09             | 1.48     | 1.06    | 2.26   | 0       | 1.32     | 1.03    | 2.19   | 0       |
| 2.1              | 1.53     | 1.10    |        | 0       | 1.37     | 1.07    |        | 0       |
| 2.11             | 1.58     | 1.14    | 2.30   | 0       | 1.42     | 1.11    | 2.23   | 0       |
| 2.13             | 1.70     | 1.22    | 2.35   | 0.02    | 1.53     | 1.19    | 2.28   | 0       |
| 2.14             | 1.76     | 1.27    |        | 0.03    | 1.59     | 1.24    |        | 0.01    |

\* Green, pink, purple and gray shadow separately mean the minimum point energy in singlet, triplet, septet and quintet states.
